# Supplementary material for: Analysis of BRCA1- and BRCA2-Related Pancreatic Cancer and Survival
Source: PubMed Central journal article supplement (PMC10682833; doi:10.1001/jamanetworkopen.2023.45013), 2023-11-27
Supplement: jamanetwopen-e2345013-s001.pdf [file jamanetwopen-e2345013-s001.pdf]

## Data Sharing Statement

### Data

**Data available:** Yes

**Data types:** Deidentified participant data

**How to access data:** [Kim.ReissBinder@pennmedicine.upenn.edu](mailto:Kim.ReissBinder@pennmedicine.upenn.edu)

**When available:** With publication

### Supporting Documents

**Document types:** None

### Additional Information

**Who can access the data:** researchers whose proposed use of the data has been approved

**Types of analyses:** researchers whose proposed use of the data has been approved

**Mechanisms of data availability:** researchers whose proposed use of the data has been approved and signed data access agreement
